# Supplementary material for: Synthesis of glycerin carbonate-based intermediates using thiol–ene chemistry and isocyanate free polyhydroxyurethanes therefrom
Source: Royal Society of Chemistry journal article supplement (doi:10.1039/c1py00289a), 2011-01-01
Supplement: c1py00289a.pdf [file c1py00289a.pdf]

## Supporting information

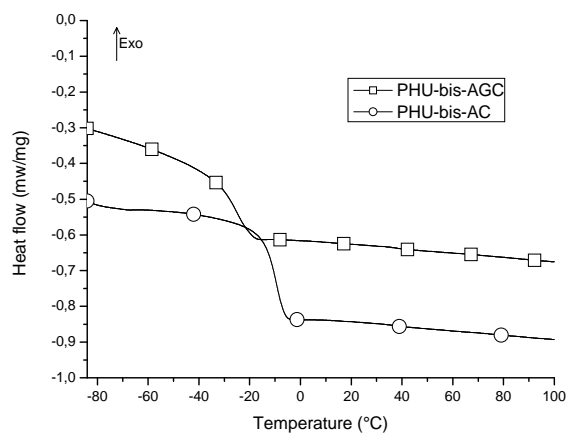

Figure S1: DSC thermograms of PHU-bis-AGC and PHU-bis-AC.

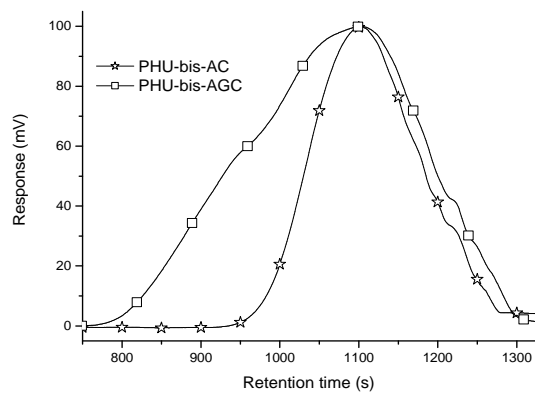

Figure S2: SEC chromatogram of PHU-bis-AGC and PHU-bis-AC in DMF solvent.

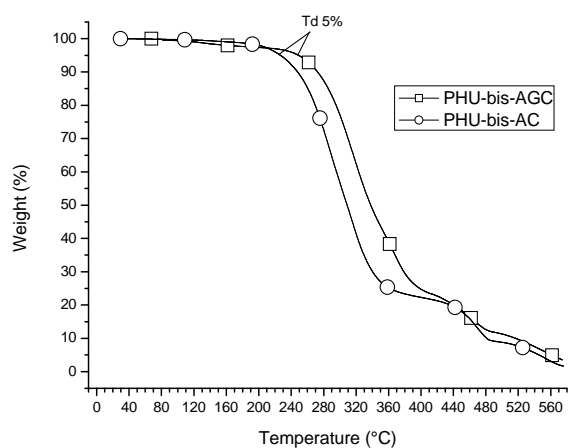

Figure S3: TGA thermogram of PHU-bis-AGC and PHU-bis-AC (heating rate 20°C/min).

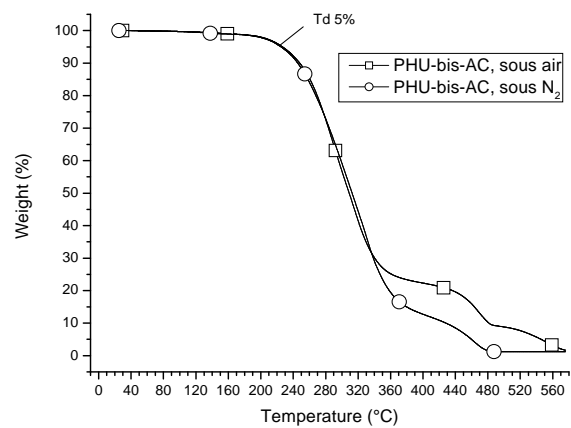

Figure S4: TGA thermogram of PHU-bis AC under air and under nitrogen (heating rate 20 °C/min).
